# Supplementary material for: Negative affect instability predicts elevated depressive and generalized anxiety disorder symptoms even when negative affect intensity is controlled for: an ecological momentary assessment study
Source: Frontiers journal article supplement (doi:10.3389/fpsyg.2024.1371115), 2024-04-23
Supplement: Data_Sheet_1.PDF [file Data_Sheet_1.PDF]

## Supplementary Material

**Table 1.** Ecological momentary assessment (EMA) questionnaire, adapted from Laidra et al. (2023).

|     | Item                                                                                                                                                                                     | Response options                                                                                                                                                                                                                                                                                                                                                                                                                                                                                                                                                                                                                                                                                                                                                |
|-----|------------------------------------------------------------------------------------------------------------------------------------------------------------------------------------------|-----------------------------------------------------------------------------------------------------------------------------------------------------------------------------------------------------------------------------------------------------------------------------------------------------------------------------------------------------------------------------------------------------------------------------------------------------------------------------------------------------------------------------------------------------------------------------------------------------------------------------------------------------------------------------------------------------------------------------------------------------------------|
|     | <b>At this moment, how strongly do you feel...</b>                                                                                                                                       |                                                                                                                                                                                                                                                                                                                                                                                                                                                                                                                                                                                                                                                                                                                                                                 |
|     | <i>Mark on each row how strongly do you currently experience one or more of these feelings</i>                                                                                           |                                                                                                                                                                                                                                                                                                                                                                                                                                                                                                                                                                                                                                                                                                                                                                 |
| 1   | <b>joyful, excited</b>                                                                                                                                                                   | Not at all ----- Very strongly (7-point scale)                                                                                                                                                                                                                                                                                                                                                                                                                                                                                                                                                                                                                                                                                                                  |
| 2   | <b>satisfied, relaxed</b>                                                                                                                                                                | Not at all ----- Very strongly (7-point scale)                                                                                                                                                                                                                                                                                                                                                                                                                                                                                                                                                                                                                                                                                                                  |
| 3   | <b>worried, anxious</b>                                                                                                                                                                  | Not at all ----- Very strongly (7-point scale)                                                                                                                                                                                                                                                                                                                                                                                                                                                                                                                                                                                                                                                                                                                  |
| 4   | <b>sad, disappointed</b>                                                                                                                                                                 | Not at all ----- Very strongly (7-point scale)                                                                                                                                                                                                                                                                                                                                                                                                                                                                                                                                                                                                                                                                                                                  |
| 5   | <b>irritated, angry</b>                                                                                                                                                                  | Not at all ----- Very strongly (7-point scale)                                                                                                                                                                                                                                                                                                                                                                                                                                                                                                                                                                                                                                                                                                                  |
| 6   | <b>tense, stressed</b>                                                                                                                                                                   | Not at all ----- Very strongly (7-point scale)                                                                                                                                                                                                                                                                                                                                                                                                                                                                                                                                                                                                                                                                                                                  |
| 7   | <b>tired, listless</b>                                                                                                                                                                   | Not at all ----- Very strongly (7-point scale)                                                                                                                                                                                                                                                                                                                                                                                                                                                                                                                                                                                                                                                                                                                  |
| 8   | <b>What are Your current feelings related to? Choose all relevant options.</b>                                                                                                           | a. An ongoing situation<br>b. An earlier situation<br>c. A situation in the future<br>d. Same situation I mentioned in the previous prompt<br>e. Work or studies<br>f. Spending leisure time<br>g. Close relationships<br>h. Other relationships<br>i. COVID-19<br>j. Celebrating something<br>k. Eating<br>l. Something else/ hard to say                                                                                                                                                                                                                                                                                                                                                                                                                      |
| 9   | <b>What have you tried to do to make yourself feel better?</b><br><i>Mark all strategies you have used since the previous prompt.</i>                                                    | a. I haven't tried anything<br>b. I suppressed my feelings<br>c. I acted out my feelings<br>d. I solved problems causing these emotions<br>e. I distracted myself with something to take my mind off my troubles<br>f. I thought how things are not as bad as they initially seemed<br>g. I thought about how bad things can be good for something<br>h. I accepted that things are as they are<br>i. I meditated or did relaxation exercises<br>j. I was physically active or worked out<br>k. I smoked<br>l. I consumed alcohol or other drugs<br>m. I ate or snacked on something<br>n. I ate more than I would have liked<br>o. I sought emotional support from my loved ones<br>p. I sought professional help or support<br>r. I did something else: _____ |
| 10  | <b>Have these techniques made you feel any better?</b>                                                                                                                                   | Not at all ----- A lot better (7-point scale)                                                                                                                                                                                                                                                                                                                                                                                                                                                                                                                                                                                                                                                                                                                   |
| 11* | <b>How well did you sleep last night?</b>                                                                                                                                                | Very unwell ----- Very well (7-point scale)                                                                                                                                                                                                                                                                                                                                                                                                                                                                                                                                                                                                                                                                                                                     |
| 12* | <b>What time did you go to bed last night?</b>                                                                                                                                           | [drop-down menu with 15-min intervals**]                                                                                                                                                                                                                                                                                                                                                                                                                                                                                                                                                                                                                                                                                                                        |
| 13* | <b>What time did you wake up this morning?</b>                                                                                                                                           | [drop-down menu with 15-min intervals**]                                                                                                                                                                                                                                                                                                                                                                                                                                                                                                                                                                                                                                                                                                                        |
| 14* | <b>How many minutes did you engage in moderate to high physical activity yesterday? (f.e. practised sports, worked out or went for a walk so that it made you sweat or gasp lightly)</b> | Insert minutes _____                                                                                                                                                                                                                                                                                                                                                                                                                                                                                                                                                                                                                                                                                                                                            |
| 15* | <b>How many minutes did you engage in light physical activity yesterday? (f.e. slow-paced walk or cycling/bike ride)</b>                                                                 | Insert minutes _____                                                                                                                                                                                                                                                                                                                                                                                                                                                                                                                                                                                                                                                                                                                                            |
| 16* | <b>Did you consume any alcoholic beverages yesterday?</b>                                                                                                                                | Yes / No                                                                                                                                                                                                                                                                                                                                                                                                                                                                                                                                                                                                                                                                                                                                                        |
| 17* | <b>How do you assess your health at the moment?</b>                                                                                                                                      | Very bad ----- Very good (7-point scale)                                                                                                                                                                                                                                                                                                                                                                                                                                                                                                                                                                                                                                                                                                                        |

Note: \* Items included only in the first prompt of each day.

## References

Laidra, K., Reile, R., Havik, M., Leinsalu, M., Murd, C., Tulviste, J., ... & Konstabel, K. (2023). Estonian National Mental Health Study: Design and methods for a registry-linked longitudinal survey. *Brain and Behavior*, e3106.

**Table 2.** Standardized regression coefficients for individual emotion dynamic indices predicting elevated depressive and generalized anxiety disorder symptoms.

| Variable           | Depressive symptoms |           |          |          | Generalized anxiety disorder symptoms |           |          |          |
|--------------------|---------------------|-----------|----------|----------|---------------------------------------|-----------|----------|----------|
|                    | <i>B</i>            | <i>SE</i> | <i>t</i> | <i>p</i> | <i>B</i>                              | <i>SE</i> | <i>t</i> | <i>p</i> |
| PA intensity       | -.29                | .37       | -4.77    | <.001    | -.29                                  | .29       | -4.75    | <.001    |
| NA intensity       | .59                 | .43       | 11.54    | <.001    | .56                                   | .34       | 10.51    | <.001    |
| PA instability     | .18                 | 1.02      | 2.76     | .0063    | .15                                   | .79       | 2.28     | .0239    |
| NA instability     | .46                 | 1.06      | 8.13     | <.001    | .52                                   | .79       | 9.54     | <.001    |
| PA inertia         | -.05                | 1.12      | -.81     | .4168    | -.04                                  | .87       | -.64     | .5213    |
| NA inertia         | .04                 | 1.10      | .62      | .539     | .07                                   | .85       | 1.03     | .3030    |
| PA differentiation | -.04                | .88       | -.65     | .5174    | .03                                   | .69       | .50      | .6208    |
| NA differentiation | .10                 | 1.46      | 1.40     | .165     | .17                                   | 1.10      | 2.50     | .0132    |

*Note:* *B* – standardized regression coefficient, NA – negative affect, PA – positive affect, *SE* – standard error. All predictors were adjusted for age and gender.

**Table 3.** Results of the initial and final linear regression models predicting elevated depressive and generalized anxiety disorder symptoms.

| <b>Depressive symptoms<br/>(n = 218)</b>                   |                      |           |          |                 |                    |           |          |                 |
|------------------------------------------------------------|----------------------|-----------|----------|-----------------|--------------------|-----------|----------|-----------------|
| <b>Variable</b>                                            | <b>Initial model</b> |           |          |                 | <b>Final model</b> |           |          |                 |
|                                                            | <i>B</i>             | <i>SE</i> | <i>t</i> | <i>p</i>        | <i>B</i>           | <i>SE</i> | <i>t</i> | <i>p</i>        |
| (Intercept)                                                | 9.42                 | 1.97      | 4.79     | <b>&lt;.001</b> | 8.44               | 2.03      | 4.17     | <b>&lt;.001</b> |
| Gender (female)                                            | .05                  | .78       | 1.0      | .3183           | .05                | .78       | 1.08     | .2819           |
| Age                                                        | -.22                 | .02       | - 4.38   | <b>&lt;.001</b> | -.22               | .02       | -4.34    | <b>&lt;.001</b> |
| PA intensity                                               | -.13                 | .32       | -2.41    | .0168           | -.13               | .31       | -2.47    | .0145           |
| NA intensity                                               | .55                  | .44       | 10.38    | <b>&lt;.001</b> | .47                | .58       | 6.67     | <b>&lt;.001</b> |
| NA instability                                             |                      |           |          |                 | .13                | 1.26      | 1.88     | <b>.0617</b>    |
| <b>Generalized anxiety disorder symptoms<br/>(n = 219)</b> |                      |           |          |                 |                    |           |          |                 |
| <b>Variable</b>                                            | <b>Initial model</b> |           |          |                 | <b>Final model</b> |           |          |                 |
|                                                            | <i>B</i>             | <i>SE</i> | <i>t</i> | <i>p</i>        | <i>B</i>           | <i>SE</i> | <i>t</i> | <i>p</i>        |
| (Intercept)                                                | 7.76                 | 1.58      | 4.92     | <b>&lt;.001</b> | 6.15               | 1.57      | 3.91     | <b>&lt;.001</b> |
| Gender (female)                                            | .08                  | .63       | 1.50     | .1344           | .09                | .61       | 1.71     | .0886           |
| Age                                                        | -.20                 | .02       | -3.88    | <b>&lt;.001</b> | -.20               | .02       | -3.90    | <b>&lt;.001</b> |
| PA intensity                                               | -.14                 | .25       | -2.55    | .0114           | -.15               | .25       | -2.75    | <b>.0065</b>    |
| NA intensity                                               | .52                  | .35       | 9.38     | <b>&lt;.001</b> | .33                | .45       | 4.69     | <b>&lt;.001</b> |
| NA instability                                             |                      |           |          |                 | .27                | .98       | 4.03     | <b>&lt;.001</b> |

*Note:* *B* – regression coefficient, NA – negative affect, PA – positive affect, *SE* – standard error.
